# Supplementary material for: So near yet so far: why won’t the UK prescribe medical cannabis?
Source: PubMed Central journal article supplement — BMJ Open. 2020 Aug 18;10(9):e038687. doi: 10.1136/bmjopen-2020-038687 (PMC7507889; doi:10.1136/bmjopen-2020-038687), 2020-08-18
Supplement: bmjopen-2020-038687.draft_revisions.pdf [file bmjopen-2020-038687.draft_revisions.pdf]

# BMJ Open

BMJ Open is committed to open peer review. As part of this commitment we make the peer review history of every article we publish publicly available.

When an article is published we post the peer reviewers' comments and the authors' responses online. We also post the versions of the paper that were used during peer review. These are the versions that the peer review comments apply to.

The versions of the paper that follow are the versions that were submitted during the peer review process. They are not the versions of record or the final published versions. They should not be cited or distributed as the published version of this manuscript.

BMJ Open is an open access journal and the full, final, typeset and author-corrected version of record of the manuscript is available on our site with no access controls, subscription charges or pay-per-view fees (<http://bmjopen.bmj.com>).

If you have any questions on BMJ Open's open peer review process please email [info.bmjopen@bmj.com](mailto:info.bmjopen@bmj.com)

# BMJ Open

## So near yet so far – why won't the UK prescribe medical cannabis?

|                                 |                                                                                                                                                                                                                                         |
|---------------------------------|-----------------------------------------------------------------------------------------------------------------------------------------------------------------------------------------------------------------------------------------|
| Journal:                        | <i>BMJ Open</i>                                                                                                                                                                                                                         |
| Manuscript ID                   | bmjopen-2020-038687.R1                                                                                                                                                                                                                  |
| Article Type:                   | Communication                                                                                                                                                                                                                           |
| Date Submitted by the Author:   | 24-Mar-2020                                                                                                                                                                                                                             |
| Complete List of Authors:       | Nutt, David; Imperial College London, Bazire, Steve; NHS Commissioning Board<br>Phillips, Lawrence; London School of Economics and Political Sciences, Department of Management<br>Schlag, Anne; King's College London - Strand Campus, |
| <b>Primary Subject Heading</b>: | Patient-centred medicine                                                                                                                                                                                                                |
| Secondary Subject Heading:      | Health policy, Research methods                                                                                                                                                                                                         |
| Keywords:                       | PUBLIC HEALTH, QUALITATIVE RESEARCH, STATISTICS & RESEARCH METHODS                                                                                                                                                                      |
|                                 |                                                                                                                                                                                                                                         |

SCHOLARONE™  
Manuscripts

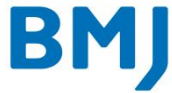

I, the Submitting Author has the right to grant and does grant on behalf of all authors of the Work (as defined in the below author licence), an exclusive licence and/or a non-exclusive licence for contributions from authors who are: i) UK Crown employees; ii) where BMJ has agreed a CC-BY licence shall apply, and/or iii) in accordance with the terms applicable for US Federal Government officers or employees acting as part of their official duties; on a worldwide, perpetual, irrevocable, royalty-free basis to BMJ Publishing Group Ltd ("BMJ") its licensees and where the relevant Journal is co-owned by BMJ to the co-owners of the Journal, to publish the Work in BMJ Open and any other BMJ products and to exploit all rights, as set out in our [licence](#).

The Submitting Author accepts and understands that any supply made under these terms is made by BMJ to the Submitting Author unless you are acting as an employee on behalf of your employer or a postgraduate student of an affiliated institution which is paying any applicable article publishing charge ("APC") for Open Access articles. Where the Submitting Author wishes to make the Work available on an Open Access basis (and intends to pay the relevant APC), the terms of reuse of such Open Access shall be governed by a Creative Commons licence – details of these licences and which [Creative Commons](#) licence will apply to this Work are set out in our licence referred to above.

Other than as permitted in any relevant BMJ Author's Self Archiving Policies, I confirm this Work has not been accepted for publication elsewhere, is not being considered for publication elsewhere and does not duplicate material already published. I confirm all authors consent to publication of this Work and authorise the granting of this licence.

## So near yet so far – why won't the UK prescribe medical cannabis?

David Nutt, FMedSci Prof of Neuropsychopharmacology, Department of Brain Sciences, Faculty of Medicine, Burlington Danes Building, Imperial College London, Hammersmith Hospital Campus Du Cane Road London W12 0NN.  
[d.nutt@imperial.ac.uk](mailto:d.nutt@imperial.ac.uk) (Corresponding author)

Stephen Bazire, PhD ex Chief Pharmacist Norfolk  
Larry Philips, PhD, Emeritus Prof of Decision Theory LSE  
Anne Schlag PhD, Drug Science Head of Research

### Abstract

Although cannabis-based plant medicines (CBPMs) are now legal in the UK, it is still challenging for patients to gain access, and only very few NHS prescriptions have been written to date. This paper attempts to make sense of why the UK lags behind so many other countries which also have legalized medical cannabis. From consulting with parents and patients, prescribers, pharmacists and decision makers it seems that there are a series of distinct barriers to prescribing that need to be overcome in order to improve patient access to medical cannabis in the UK. These include concerns about the perceived lack of scientific evidence. To alleviate these concerns, we highlight the importance of patient-centred approaches including patient-reported outcomes, pharmacoepidemiology, and n=1 trials, which can contribute to the development of the evidence base for medical cannabis. We hope that this paper will help policy makers and prescribers understand the challenges to prescribing and so help them develop approaches to overcome the current unsatisfactory situation.

### Article Summary: Strengths and weaknesses

- There are a series of distinct barriers to prescribing medical cannabis that need to be overcome in order to improve patient access in the UK.
- Concerns about the perceived lack of RCT evidence are misplaced as many patient-centred approaches including patient-reported outcomes, pharmacoepidemiology, and n=1 trials can be applied.
- Thousands of UK patients self-medicate with CBPMs and the international data base evidence suggest these new medical products offer a significant advance in treatment for many in whom current medicines are either ineffective or poorly tolerated.
- We hope that this paper will help policy makers and prescribers understand the challenges to prescribing and so help them develop approaches to overcome the current unsatisfactory situation.

### Introduction

In Nov 2018 when the UK made cannabis-based plant medicines (CBPMs) legal most people assumed these would immediately be made available to patients, but they were wrong. In the year since almost no NHS prescriptions have been issued [1] and less than a hundred have been made available from private providers at a cost of at least £1000 a month [2]. For these reasons, some parents of children with severe epilepsy continue to go overseas to get their children access to the only treatment which has proven to be effective for their condition. Moreover, the vast majority of

1  
2  
3 the estimated 1.4 million medical cannabis users [3] source from the black market with its problems  
4 of illegality, unknown quality, content and provenance. Given the substantial evidence of utility of  
5 CBPMs in many disorders as identified in the US National Academy of Sciences review in 2017 [4]  
6 this failure of delivery in the UK seems odd and, to many, inexcusable.  
7

### 8 9 **Concerns about perceived lack of evidence**

10 Statements such as “insufficient evidence of efficacy” or “it is too dangerous” are common and used  
11 even in the face of strong personal evidence from patients that CBPMs work and, in many cases, can  
12 be lifechanging and well tolerated. Many doctors fail to include the evidence of the patient-lived  
13 experience and cite the lack of placebo-controlled trials in every possible indication for their  
14 hesitation to prescribe. Whilst tens of thousands of individual patient reports of the therapeutic  
15 value of CBPMs as in the Canadian and NY State data bases [5] do not equate to the so-called gold-  
16 standard double-blind RCT level of proof, they are highly suggestive of a pattern of evidence which  
17 should be taken seriously rather than summarily dismissed.  
18

19  
20 The major criticism of the lack of placebo-controlled trials is misplaced. Prescribers often mistakenly  
21 state that without these they cannot prescribe. However, there are over 50 medicines or indications  
22 that have been licensed by FDA and/or EMA between 1999 and 2014 without randomised controlled  
23 trial data [6].  
24

25  
26 Moreover, the ex-head of NICE and the MHRA, Sir Michael Rawlins, challenged this RCT  
27 preconception in the 2008 Harvean Oration, highlighting that “*randomised controlled trials (RCTs),*  
28 *long regarded at the 'gold standard' of evidence, have been put on an undeserved pedestal. Their*  
29 *appearance at the top of "hierarchies" of evidence is inappropriate; and hierarchies, themselves, are*  
30 *illusory tools for assessing evidence. They should be replaced by a diversity of approaches that*  
31 *involve analysing the totality of the evidence-base.*[7]  
32

33  
34 Placebo controlled double-blind trials are clearly a very important element of medicine where their  
35 primary role is to provide evidence for companies to get a marketing authorisation. Such trials are  
36 done in tightly selected patient groups that are not representative of the average patient who often  
37 has many different medical comorbidities. Therefore, even when such trials are positive, they are  
38 only suggestive of efficacy in the wider patient groups and other approaches such as effectiveness  
39 trials or clinical audits are required to properly estimate real-world value to individual patients.  
40

41  
42 Of these new approaches, patient-reported outcomes [PROs] are probably the most significant  
43 development. These have received immense investment from the USA NIH and many new scales  
44 have been developed for this purpose. PRO measures are now required as elements of outcome  
45 measures for clinical trials funded by the NIH in the USA  
46 [<https://commonfund.nih.gov/promis/index>]. PROs put more emphasis on the patient’s life and  
47 wellbeing and have been shown to be more sensitive to the effects of medical cannabis than  
48 traditional symptom-based measures. For example, a large recent naturalistic German study on pain  
49 syndromes using PROs found adding a CBPM very significantly improved outcomes in patients with  
50 neuropathic pain [8]. Other recent papers showing real-world benefits from CBPMs using patient  
51 reports have been reported in Parkinson's disease [9] and autism [10]. NICE has developed a cadre  
52 of expert patients to advise them of the patients perspective [ [https://www.scie-](https://www.scie-socialcareonline.org.uk/the-expert-patients-rogramme/r/a1CG000000GNbcMAG)  
53 [socialcareonline.org.uk/the-expert-patients-rogramme/r/a1CG000000GNbcMAG](https://www.scie-socialcareonline.org.uk/the-expert-patients-rogramme/r/a1CG000000GNbcMAG) ] although it is  
54 not apparent if this includes a patient with experience of medical cannabis. Progress in this direction  
55 has led to the setting up of a special centre in Cambridge for patient-led research in the clinical trials  
56 unit: [https://www.cuh.nhs.uk/clinical-trials/cambridge-clinical-trials-unit-cctu/patient-led-research-](https://www.cuh.nhs.uk/clinical-trials/cambridge-clinical-trials-unit-cctu/patient-led-research-hub)  
57 [hub](https://www.cuh.nhs.uk/clinical-trials/cambridge-clinical-trials-unit-cctu/patient-led-research-hub).  
58  
59  
60

1  
2  
3 Pharmacoepidemiology and, specifically, observational research is another recent patient centred  
4 approach to study the effectiveness of real-world medication [11]. Advantages include the availability  
5 of large patient samples, coverage of under-researched subpopulations in their naturalistic conditions  
6 and lower costs than RCTs [12]. The limitation of the non-randomised nature of treatment selection  
7 can be addressed by including comparison groups, or through the triangulation of multiple analytical  
8 approaches to improve confidence in inferred causal relationships.  
9

10  
11 With many clinicians demanding better and faster evidence to inform their decisions around  
12 prescribing CBPMs, these newer approaches offer potential solutions to the lack of RCTs. Indeed, in  
13 line with rapid developments in data resources and analytical techniques, many guidelines are now  
14 beginning to include evidence from robust observational pharmacoepidemiological studies alongside  
15 RCTs [12].  
16

17  
18 But even more important are the n=1 trials, for these are **the core** of medical practice since every  
19 time a medicine is prescribed an n=1 experiment is being conducted. In some patients the  
20 experiment works and in others it fails, the patient either does not respond or the adverse effects  
21 outweigh the therapeutic benefit. One might therefore expect that doctors would welcome patients  
22 who have conducted successful self-treatment with cannabis since it is almost certain that  
23 prescribing medical cannabis to these will work, providing a therapeutic win for both patient and  
24 prescriber.  
25

26  
27 The resurrection of CBPMs following its banning by the UN Conventions is directly attributable to  
28 n=1 trials conducted in children with intractable epilepsy. The first was Charlotte Web in the USA  
29 that inspired UK parents of children with similar epilepsies notably Alfie Dingley and Billy Caldwell.  
30 These children were facing death and/or brain damage from multiple seizures resistant to licensed  
31 treatments and CBPMs restored them to close to normality and also allowed them to come off other  
32 medicines. In the case of Billy, the proof of therapeutic efficacy was dangerously established by the  
33 confiscation of his medical cannabis by UK customs which led to a life-threatening episode of status  
34 epilepticus requiring admission to intensive care. The public outcry over such callous treatment by  
35 the UK government was the immediate cause of the rescheduling of medical cannabis in November  
36 2018.  
37

38  
39 In scientific terms Billy was the subject of an A-B-A design, one of the most powerful methodologies  
40 for examining a medical intervention. The UK government accepted that in these cases CBPMs  
41 worked. So why would any prescriber resist similar claims in their patients, particularly if they had  
42 seen their own previously prescribed treatments fail? In such cases to deny a patient a CBPM simply  
43 because they are using an “illegally” sourced preparation is illogical and could be construed as being  
44 unethical. Germany took this view when deciding to make medical cannabis available. The GMC  
45 guidance on good medical practice makes it clear that all registered doctors must take into account  
46 and respect patients’ views and experience.  
47

48  
49 Scientific support for ABA trials is well established in educational, behavioural and psychological  
50 assessment but less so in medical research [13]. An ABA(B) trial design is well-suited for determining  
51 whether medical cannabis is efficacious. Bayesian analysis can also combine separate ABA(B) results  
52 from different populations of patients, such as cannabis and non-cannabis users, stratified as  
53 suggested by experts whose experience has identified possible confounding variables [14]. This  
54 approach is known as multi-level regression and post-stratification (MRP) [15].  
55

### 56 **What are the reasons for this resistance?**

57  
58 One source of this resistance is that because CBPMs are patient-driven, to welcome them would be  
59 an admission that the patients are more knowledgeable than the doctor. Despite over a decade of  
60

1  
2  
3 demands by the DHSC for patients to have a say in medical practice in the UK, there has been little  
4 progress. In this debate it is usually forgotten that cannabis was a licensed medicine in the UK  
5 before 1971. So why does the government not just re-issue the license that applied then? Phenergan  
6 and chloral hydrate have continued to be available in the UK since that time despite no double-blind  
7 clinical trial data and chloral is sometimes used as an anti-epilepsy treatment in the children with  
8 epilepsy who are denied CBMPs!  
9

10  
11 Another factor is the “not invented here” syndrome. UK prescribers often say they only trust data  
12 collected here; an attitude justified by our high-quality health technology assessment processes  
13 especially NICE. However, to ignore data from other countries in a field as complicated as medical  
14 cannabis likely distorts the truth. Medical cannabis has been available for over a decade in many  
15 states in the USA and there are over 400,000 patients on the Canadian Health data base. These data  
16 should be interrogated as a way to accelerated clinically-relevant information to potential  
17 prescribers as the Health Secretary Matt Hancock stated in July 2019 [16].  
18  
19

20 This statement calls into question the current DHSC rule that medical cannabis must be considered a  
21 “Special”. The challenges of Specials to prescribers are not trivial and include:

- 22 1. Organisational bureaucracy and the subsequent delay of prescribing, approval and supply
- 23 2. Transferring a patient between one sector and another, especially where e.g. primary care will  
24 not continue prescribing of a superficially expensive special or unlicensed product
- 25 3. Local secondary and primary care services having different rules and guidance, particularly about  
26 prescribing unlicensed medicines
- 27 4. Responsibility for prescribing - a licensed product’s manufacturer is accountable for any untold  
28 harm if the product is used within the license, but with an unlicensed product or Special the  
29 **prescriber** assumes responsibility for any harm that occurs, unless it can be directly attributed to  
30 a defect in the actual product.  
31  
32  
33  
34

35 These complexities do give some support to doctors’ perception of prescribing as too difficult.  
36 Moreover, the DHSC has made cannabis a special “special” as prescribing requires a special pink pad  
37 that has to be ordered. Why such constraints are required is unclear given the established safety of  
38 cannabis medicines, but they are problematic for the prescriber and likely deter use.  
39 Most UK doctors have no experience of medical cannabis and comments like “I don’t know what to  
40 prescribe” are often heard. Though understandable they reflect poorly on a profession which  
41 generally welcomes engaging with new therapeutics; until medical cannabis came along prescribers  
42 were rarely fearful of new therapeutics. Moreover, new is not really a credible term given the  
43 decade of CBMPs use in USA, Canada and The Netherlands. The 1998 House of Lords report on  
44 medical cannabis provided clear evidence on efficacy and value of medical cannabis [17]. Both  
45 d9THC [e.g. as nabilone] and a mixture of d9THC and cannabidiol [as Sativex] have been licensed  
46 medicines in the UK for over a decade. The decision to move cannabis to Schedule 2 was made on  
47 the basis that there was adequate data that it was a medicine [18]. It is true that there is little in the  
48 way of teaching on medical cannabis in the undergrad or postgrad medical curricula but there are  
49 several free on-line teaching courses on medical cannabis to remedy this shortcoming, including one  
50 run by our charity DrugScienceorg.uk.  
51  
52  
53

54 Perhaps one reason for resistance to CBPMs is that for nearly 50 years the medical profession  
55 focused of the risks of cannabis with extreme claims of harms, including male sterility, lung cancer  
56 and schizophrenia. Though these have now been largely debunked and were generally the result of  
57 recreational rather than prescribed medical use, many practitioners may not know this. Even if they  
58 do, there can be significant concern in prescribing a drug that has been vilified for decades as toxic.  
59 Here education is the solution.  
60

### The pharmacy perspective

Pharmacists (especially at Clinical Commissioning Group level) and medical prescribing advisors also play a significant role, often through Area Prescribing Committees (APCs). Pharmacy advisors tend to think of themselves as guardians of the public purse in relation to medicines prescribing. Their default position is usually to resist the cost implications of new medicines by blocking approval to local prescribing lists. Here the resistance is often derived from a misplaced focus of prescription costs with the cost benefits of saving in other medicines and interventions being ignored; e.g. medical cannabis can reduce the use of strong opioids [19, 20], and lower prescription costs [21].

We suggest that APCs should give CBPMs a fair chance by:

- Agreeing with the relevant consultants e.g. pain or neurology clinics, a specified number of patients each year
- Factor in the costs of the alternatives e.g. opioid overuse (due to lack of efficacy for many pains), benzodiazepines and pregabalin/gabapentin over- or self-medication
- Take genuine notice of testimonies from patients, who will not be diverting CBPMs because they need it
- Remember that generic substitution of CBPMs is not an option either as all products have proportions of THCs and CBD and will give different actions
- Remember that many CBPM products do not have sufficient d9THC in them to make patients 'stoned'
- Ensure better training locally

### Conclusions

The many thousands of UK patients self-medicating with CBPMs and the international data base evidence suggest these new medical products offer a significant advance in treatment for many in whom current medicines are either ineffective or poorly tolerated. They also offer the potential of significant cost savings to the NHS in terms of reduced hospital stays and less prescribing of other medicines particularly opioids for chronic pain. The failure of the medical and pharmacy professions to embrace CBPMs despite their being made "legal" 12 months ago is a great worry to patients and will already likely have led to preventable deaths from conditions such as epilepsy. We hope that this paper will help policy makers and prescribers understand the challenges to prescribing and so help them develop approaches to overcome the current highly unsatisfactory situation.

### Contributorship statement

Prof David Nutt is guarantor and developed the initial manuscript. Prof Larry Phillips and Dr Anne Schlag developed the section on concerns about perceived lack of evidence. Prof Steve Bazire wrote the pharmacy perspective. All authors reviewed the manuscript and agreed on the final submission.

*The Corresponding Author has the right to grant on behalf of all authors and does grant on behalf of all authors, an exclusive licence (or non exclusive for government employees) on a worldwide basis to the BMJ Publishing Group Ltd to permit this article (if accepted) to be published in BMJ editions and any other BMJPG products and sublicences such use and exploit all subsidiary rights, as set out in our licence.*

### Ethical approval

Ethical approval was not required.



**Patient and public involvement**

Patients and/or members of the public were not involved in the creation of their article.

**Dissemination declaration**

Dissemination to these groups is not applicable.

**Data sharing statement**

No additional data available.

**Funding**

No funding was received for the writing of this paper.

**Declarations of Interest**

Dr Schlag is a paid researcher for Drug Science a charity that receives unrestricted educational donations from several sources including some companies that manufacture or distribute medical cannabis products. The others declare no conflicts.

**References**

1 Sumnall H. Medicinal cannabis: legalised yet impossible to access. The Independent 13 May 2019. <https://www.independent.co.uk/life-style/health-and-families/health-news/medicinal-cannabis-legalised-access-marijuana-nhs-a8903051.html>

2 Wickware C. NHS England cannabis access review to speak with families paying £40k for private prescriptions. The Pharmaceutical Journal 13 May 2019. <https://www.pharmaceutical-journal.com/news-and-analysis/news/nhs-england-cannabis-access-review-to-speak-with-families-paying-40k-for-private-prescriptions/20206525.article>

3 The Centre for Medical Cannabis (CMC) YouGov Study on Medical Cannabis Use. (In Press) <https://inews.co.uk/news/health/street-cannabis-survey-centre-medicinal-cannabis-chronic-conditions-920986>

4 National Academies of Sciences, Engineering, and Medicine (NASEM). The health effects of cannabis and cannabinoids: The current state of evidence and recommendations for research. Washington, DC: The National Academies Press, 2017.

5 Health Canada. Canada Vigilance Adverse Reaction Online Database. <https://www.canada.ca/en/health-canada/services/drugs-health-products/medeffect-canada/adverse-reaction-database.html>

6 Hatswell A, Baio G, Berlin J, Irs, A, Freemantle N. Regulatory approval of pharmaceuticals without a randomised controlled study: analysis of EMA and FDA approvals 1999–2014. *BMJ Open* 2016; 6(6): e011666.

7 The Royal College of Physicians: Sir Michael Rawlins attacks traditional ways of assessing evidence, Opinion Former Article 16 October 2008. <https://www.politics.co.uk/opinion-formers/royal-college-of-physicians/article/royal-college-of-physicians-sir-michael-rawlins-attacks-trad>

- 1  
2  
3 8 Ueberall M, Essner U, Mueller-Schwefe G. Effectiveness and tolerability of THC: CBD oromucosal  
4 spray as add-on measure in patients with severe chronic pain: Analysis of 12-week open-label real-  
5 world data provided by the German pain e-registry. *J Pain Res.* 2019; 12: 1577-1604.  
6  
7  
8 9 Balash Y, Bar-Lev Schleider L, Korczyn A et al. Medical Cannabis in Parkinson Disease: Real-Life  
9 Patients' Experience. *Clin. Neuropharmacol.* 2017; 40(6):268-272. doi:  
10 10.1097/WNF.0000000000000246.  
11  
12 10 Bar-Lev Schleider L, Mechoulam R, Saban N, Meiri G, Novack V. Real life Experience of  
13 Medical Cannabis Treatment in Autism: Analysis of Safety and Efficacy. *Sci Rep.* 2019; 9(1):200. doi:  
14 10.1038/s41598-018  
15  
16 11 Steinhubl S, Wolff-Hughes D, Nilsen W, Iturriaga N, Califf R. Digital clinical trials: creating a vision  
17 of the future. *NPJ Digit Med.* 2019; 2:126. doi.org/10.1038/s41746-019-0203-0  
18  
19 12 Davis K, Farooq S, Hives K et al. Pharmacoepidemiology research: delivering evidence about drug  
20 safety and effectiveness in mental health. *Lancet Psy* 2019; Nov 25.  
21 DOI:[https://doi.org/10.1016/S2215-0366\(19\)30298-6](https://doi.org/10.1016/S2215-0366(19)30298-6)  
22  
23 13 Lillie E, Patay B, Diamant J, Issell B, Topol E, Schork N. The n-of-1 clinical trial: the ultimate  
24 strategy for individualizing medicine? *Future Medicine.* 2011; 8(2).  
25 doi:<https://doi.org/10.2217/pme.11.7>  
26  
27 14 Zucker D, Ruthazer R, Schmid C. Individual (N-of-1) trials can be combined to give population  
28 comparative treatment effect estimates: ethodologic considerations. *J Clin Epidemiol.* 2010; 63(12):  
29 1312-1323. doi:10.1016/j.jclinepi.2010.04.020  
30  
31 15 Spiegelhalter D. *The Art of Statistics: Leaning from Data.* United Kingdom: Penguin Random  
32 House, 2019.  
33  
34 16 UK trials not needed for medical cannabis licensing process, says Hancock. *The Pharmaceutical*  
35 *Journal.* 15 July 2019. [https://www.pharmaceutical-journal.com//news-and-analysis/news-in-](https://www.pharmaceutical-journal.com//news-and-analysis/news-in-brief/uk-trials-not-needed-for-medical-cannabis-licensing-process-says-hancock/20206808.fullarticle?firstPass=false)  
36 [brief/uk-trials-not-needed-for-medical-cannabis-licensing-process-says-](https://www.pharmaceutical-journal.com//news-and-analysis/news-in-brief/uk-trials-not-needed-for-medical-cannabis-licensing-process-says-hancock/20206808.fullarticle?firstPass=false)  
37 [hancock/20206808.fullarticle?firstPass=false](https://www.pharmaceutical-journal.com//news-and-analysis/news-in-brief/uk-trials-not-needed-for-medical-cannabis-licensing-process-says-hancock/20206808.fullarticle?firstPass=false)  
38  
39 17 House of Lords Report. Cannabis: The scientific and medical evidence. 1998.  
40 <https://publications.parliament.uk/pa/ld199798/ldselect/ldsctech/151/15102.htm>  
41  
42 18 Dame Sally Davis. Cannabis Scheduling Review Part 1- The therapeutic and medicinal benefits of  
43 Cannabis based products – a review of recent evidence. 2018.  
44 [https://assets.publishing.service.gov.uk/government/uploads/system/uploads/attachment\\_data/file](https://assets.publishing.service.gov.uk/government/uploads/system/uploads/attachment_data/file/722010/CMO_Report_Cannabis_Products_Web_Accessible.pdf)  
45 [/722010/CMO\\_Report\\_Cannabis\\_Products\\_Web\\_Accessible.pdf](https://assets.publishing.service.gov.uk/government/uploads/system/uploads/attachment_data/file/722010/CMO_Report_Cannabis_Products_Web_Accessible.pdf)  
46  
47 19 McMichael B, Van Horn R, Viscusi, W. The impact of cannabis access laws on opioid prescribing. *J*  
48 *Health Econ.* Jan 2020; 69. <https://doi.org/10.1016/j.jhealeco.2019.102273>  
49  
50 20 Boehnke K, Litinas E, Clauw, D. Medical cannabis use Is associated with decreased opiate  
51 medication use in a retrospective cross-sectional survey of patients with chronic pain. *Journal of*  
52 *Pain.* 2016; 17(6): 739–744. <https://doi.org/10.1016/j.jpain.2016.03.002>  
53  
54  
55  
56  
57  
58  
59  
60

21 Bellnier T, Brown G, Ortega T. Preliminary evaluation of the efficacy, safety, and costs associated with the treatment of chronic pain with medical cannabis. *Ment Health Clin.* 2018; 8(3): 110-115.

For peer review only

1  
2  
3  
4  
5  
6  
7  
8  
9  
10  
11  
12  
13  
14  
15  
16  
17  
18  
19  
20  
21  
22  
23  
24  
25  
26  
27  
28  
29  
30  
31  
32  
33  
34  
35  
36  
37  
38  
39  
40  
41  
42  
43  
44  
45  
46  
47  
48  
49  
50  
51  
52  
53  
54  
55  
56  
57  
58  
59  
60

# BMJ Open

## So near yet so far – why won't the UK prescribe medical cannabis?

|                                 |                                                                                                                                                                                                                                         |
|---------------------------------|-----------------------------------------------------------------------------------------------------------------------------------------------------------------------------------------------------------------------------------------|
| Journal:                        | <i>BMJ Open</i>                                                                                                                                                                                                                         |
| Manuscript ID                   | bmjopen-2020-038687.R2                                                                                                                                                                                                                  |
| Article Type:                   | Communication                                                                                                                                                                                                                           |
| Date Submitted by the Author:   | 25-Jun-2020                                                                                                                                                                                                                             |
| Complete List of Authors:       | Nutt, David; Imperial College London, Bazire, Steve; NHS Commissioning Board<br>Phillips, Lawrence; London School of Economics and Political Sciences, Department of Management<br>Schlag, Anne; King's College London - Strand Campus, |
| <b>Primary Subject Heading</b>: | Patient-centred medicine                                                                                                                                                                                                                |
| Secondary Subject Heading:      | Health policy, Research methods                                                                                                                                                                                                         |
| Keywords:                       | PUBLIC HEALTH, QUALITATIVE RESEARCH, STATISTICS & RESEARCH METHODS                                                                                                                                                                      |
|                                 |                                                                                                                                                                                                                                         |

SCHOLARONE™  
Manuscripts



I, the Submitting Author has the right to grant and does grant on behalf of all authors of the Work (as defined in the below author licence), an exclusive licence and/or a non-exclusive licence for contributions from authors who are: i) UK Crown employees; ii) where BMJ has agreed a CC-BY licence shall apply, and/or iii) in accordance with the terms applicable for US Federal Government officers or employees acting as part of their official duties; on a worldwide, perpetual, irrevocable, royalty-free basis to BMJ Publishing Group Ltd ("BMJ") its licensees and where the relevant Journal is co-owned by BMJ to the co-owners of the Journal, to publish the Work in BMJ Open and any other BMJ products and to exploit all rights, as set out in our [licence](#).

The Submitting Author accepts and understands that any supply made under these terms is made by BMJ to the Submitting Author unless you are acting as an employee on behalf of your employer or a postgraduate student of an affiliated institution which is paying any applicable article publishing charge ("APC") for Open Access articles. Where the Submitting Author wishes to make the Work available on an Open Access basis (and intends to pay the relevant APC), the terms of reuse of such Open Access shall be governed by a Creative Commons licence – details of these licences and which [Creative Commons](#) licence will apply to this Work are set out in our licence referred to above.

Other than as permitted in any relevant BMJ Author's Self Archiving Policies, I confirm this Work has not been accepted for publication elsewhere, is not being considered for publication elsewhere and does not duplicate material already published. I confirm all authors consent to publication of this Work and authorise the granting of this licence.

## So near yet so far – why won't the UK prescribe medical cannabis?

David J Nutt, FMedSci Prof of Neuropsychopharmacology, Department of Brain Sciences, Faculty of Medicine, Burlington Danes Building, Imperial College London, Hammersmith Hospital Campus Du Cane Road London W12 0NN.  
[d.nutt@imperial.ac.uk](mailto:d.nutt@imperial.ac.uk) (Corresponding author)

Steve Bazire, PhD ex Chief Pharmacist Norfolk  
Lawrence D Phillips, PhD, Emeritus Prof of Decision Theory LSE  
Anne K Schlag PhD, Drug Science Head of Research

### Abstract

Although cannabis-based products for medicinal use (CBPMs) are now legal in the UK, it is still challenging for patients to gain access, and only very few NHS prescriptions have been written to date. This paper attempts to make sense of why the UK lags behind so many other countries which also have legalized medical cannabis. From consulting with parents and patients, prescribers, pharmacists and decision makers it seems that there are a series of distinct barriers to prescribing that need to be overcome in order to improve patient access to medical cannabis in the UK. These include concerns about the perceived lack of scientific evidence. To alleviate these concerns, we highlight the importance of patient-centred approaches including patient-reported outcomes, pharmacoepidemiology, and n=1 trials, which can contribute to the development of the evidence base for medical cannabis. We hope that this paper will help policy makers and prescribers understand the challenges to prescribing and so help them develop approaches to overcome the current situation which is detrimental to patients.

### Article Summary: Strengths and weaknesses

- There are a series of distinct barriers to prescribing medical cannabis that need to be overcome in order to improve patient access in the UK.
- Concerns about the perceived lack of RCT evidence are misplaced as many patient-centred approaches including patient-reported outcomes, pharmacoepidemiology, and n=1 trials can be applied.
- Thousands of UK patients self-medicating with illicit CBPMs and the international data base evidence suggest this new class of drugs offer a significant advance in treatment for many in whom current medicines are either ineffective or poorly tolerated.
- We hope that this paper will help policy makers and prescribers understand the challenges to prescribing and so help them develop approaches to overcome the current unsatisfactory situation.

### Introduction

In Nov 2018 when the UK made cannabis-based products for medicinal use (CBPMs) legal most people assumed these would immediately be made available to patients, but they were wrong. In the year since almost no NHS prescriptions have been issued [1] and less than a hundred have been made available from private providers at a cost of at least £1000 a month [2]. For these reasons, some parents of children with severe epilepsy continue to go overseas to get their children access to the only treatment which has proven to be effective for their condition, i.e. a cannabinoid medication. Moreover, the vast majority of the estimated 1.4 million medical cannabis users [3]

1  
2  
3 source from the black market with its problems of illegality, unknown quality, content and  
4 provenance. Given the substantial evidence of utility of CBPMs in many disorders as identified in the  
5 US National Academy of Sciences review in 2017 [4] this failure of delivery in the UK seems odd and,  
6 to many, inexcusable.  
7

### 8 **Concerns about perceived lack of evidence**

9 Statements such as “insufficient evidence of efficacy” or “it is too dangerous” are common and used  
10 even in the face of strong personal evidence from patients that CBPMs work and, in many cases, can  
11 be lifechanging and well tolerated. Many doctors fail to include the evidence of the patient-lived  
12 experience and cite the lack of placebo-controlled trials in every possible indication for their  
13 hesitation to prescribe. Whilst tens of thousands of individual patient reports of the therapeutic  
14 value of CBPMs as in the Canadian and Minnesota data bases [5; 6] do not equate to the so-called  
15 gold-standard double-blind RCT level of proof, they are highly suggestive of a pattern of evidence  
16 which should be taken seriously rather than summarily dismissed. These large-scale data bases could  
17 be further interrogated and systematically analysed to collate PROs and other existing evidence for  
18 peer-reviewed publications. In the UK, Drug Science recently launched Project TWENTY21, the  
19 largest national medical cannabis registry in Europe, with the aim to create a structured body of  
20 evidence for the effectiveness and tolerability of medical cannabis for a broad range of conditions  
21 (<https://drugscience.org.uk/project-twenty21/>). Moreover, Drug Science is also currently working on  
22 audits utilising existing data of epilepsy patients prescribed medical cannabis, showing for example,  
23 a clear reduction of seizures after medical cannabis use.  
24  
25  
26  
27

28 The major criticism of the lack of placebo-controlled trials is misplaced. Prescribers often mistakenly  
29 state that without these they cannot prescribe. However, there are over 50 medicines or indications  
30 that have been licensed by FDA and/or EMA between 1999 and 2014 without randomised controlled  
31 trial data [7].  
32

33 Moreover, the ex-head of NICE and the MHRA, Sir Michael Rawlins, challenged this RCT  
34 preconception in the 2008 Harvean Oration, highlighting that “*randomised controlled trials (RCTs),*  
35 *long regarded at the 'gold standard' of evidence, have been put on an undeserved pedestal. Their*  
36 *appearance at the top of "hierarchies" of evidence is inappropriate; and hierarchies, themselves, are*  
37 *illusory tools for assessing evidence. They should be replaced by a diversity of approaches that*  
38 *involve analysing the totality of the evidence-base.*[8]  
39  
40

41 Placebo controlled double-blind trials are clearly a very important element of medicine where their  
42 primary role is to provide evidence for companies to get a marketing authorisation. Such trials are  
43 done in tightly selected patient groups that are not representative of the average patient who often  
44 has many different medical comorbidities. Therefore, even when such trials are positive, they are  
45 only suggestive of efficacy in the wider patient groups and other approaches such as effectiveness  
46 trials or clinical audits are required to properly estimate real-world value to individual patients.  
47  
48

49 Of these new approaches, patient-reported outcomes [PROs] are probably the most significant  
50 development. These have received immense investment from the USA NIH and many new scales  
51 have been developed for this purpose. PRO measures are now required as elements of outcome  
52 measures for clinical trials funded by the NIH in the USA  
53 (<https://commonfund.nih.gov/promis/index>). PROs put more emphasis on the patient’s life and  
54 wellbeing and have been shown to be more sensitive to the effects of medical cannabis than  
55 traditional symptom-based measures. For example, a large recent naturalistic German study on pain  
56 syndromes using PROs found adding a CBPM very significantly improved outcomes in patients with  
57 neuropathic pain [9]. Other recent papers showing real-world benefits from CBPMs using patient  
58 reports have been reported in Parkinson's disease [10] and autism [11]. NICE has developed a cadre  
59  
60

1  
2  
3 of expert patients to advise them of the patients perspective [ <https://www.scie-socialcareonline.org.uk/the-expert-patients-rogramme/r/a1CG000000GNbcMAG> ] although it is  
4 not apparent if this includes a patient with experience of medical cannabis. Progress in this direction  
5 has led to the setting up of a special centre in Cambridge for patient-led research in the clinical trials  
6 unit: [https://www.cuh.nhs.uk/clinical-trials/cambridge-clinical-trials-unit-cctu/patient-led-research-](https://www.cuh.nhs.uk/clinical-trials/cambridge-clinical-trials-unit-cctu/patient-led-research-hub)  
7 [hub](https://www.cuh.nhs.uk/clinical-trials/cambridge-clinical-trials-unit-cctu/patient-led-research-hub).  
8  
9

10  
11 Pharmacoepidemiology and, specifically, observational research is another recent patient centred  
12 approach to study the effectiveness of real-world medication [12]. Advantages include the availability  
13 of large patient samples, coverage of under-researched subpopulations in their naturalistic conditions  
14 and lower costs than RCTs [13]. The limitation of the non-randomised nature of treatment selection  
15 can be addressed by including comparison groups, or through the triangulation of multiple analytical  
16 approaches to improve confidence in inferred causal relationships.  
17

18  
19 With many clinicians demanding better and faster evidence to inform their decisions around  
20 prescribing CBPMs, these newer approaches offer potential solutions to the lack of RCTs. Indeed, in  
21 line with rapid developments in data resources and analytical techniques, many guidelines are now  
22 beginning to include evidence from robust observational pharmacoepidemiological studies alongside  
23 RCTs [13].  
24

25  
26 But even more important are the n=1 trials, for these are **the core** of medical practice since every  
27 time a medicine is prescribed an n=1 experiment is being conducted. In some patients the  
28 experiment works and in others it fails, the patient either does not respond or the adverse effects  
29 outweigh the therapeutic benefit. One might therefore expect that doctors would welcome patients  
30 who have conducted successful self-treatment with cannabis since it is almost certain that  
31 prescribing medical cannabis to these will work, providing a therapeutic win for both patient and  
32 prescriber.  
33

34  
35 The resurrection of CBPMs following its banning by the UN Conventions is directly attributable to  
36 n=1 trials conducted in children with intractable epilepsy. The first patient was Charlotte Web in the  
37 USA who inspired UK parents of children with similar epilepsies notably Alfie Dingley and Billy  
38 Caldwell. These children were facing death and/or brain damage from multiple seizures resistant to  
39 licensed treatments and CBPMs restored them to close to normality and also allowed them to come  
40 of other medicines. In the case of Billy, the proof of therapeutic efficacy was dangerously established  
41 by the confiscation of his medical cannabis by UK customs which led to a life-threatening episode of  
42 status epilepticus requiring admission to intensive care. The public outcry over such callous  
43 treatment by the UK government was the immediate cause of the rescheduling of medical cannabis  
44 in November 2018.  
45

46  
47 In scientific terms Billy was the subject of an A-B-A design, one of the most powerful methodologies  
48 for examining a medical intervention. The UK government accepted that in these cases CBPMs  
49 worked. So why would any prescriber resist similar claims in their patients, particularly if they had  
50 seen their own previously prescribed treatments fail? In such cases to deny a patient a CBPM simply  
51 because they are using an “illegally” sourced preparation is illogical and could be construed as being  
52 unethical. Germany took this view when deciding to make medical cannabis available. The GMC  
53 guidance on good medical practice makes it clear that all registered doctors must take into account  
54 and respect patients’ views and experience.  
55

56  
57 Scientific support for ABA trials is well established in educational, behavioural and psychological  
58 assessment but less so in medical research [14, 15]. An ABA(B) trial design is well-suited for  
59 determining whether medical cannabis is efficacious. Bayesian analysis can also combine separate  
60



1  
2  
3 ABA(B) results from different populations of patients, such as cannabis and non-cannabis users,  
4 stratified as suggested by experts whose experience has identified possible confounding variables  
5 [16]. This approach is known as multi-level regression and post-stratification (MRP) [17].  
6  
7

### 8 **What are the reasons for this resistance?**

9 One source of this resistance is that because CBPMs are patient-driven, to welcome them would be  
10 an admission that the patients are more knowledgeable than the doctor. Despite over a decade of  
11 demands by the DHSC for patients to have a say in medical practice in the UK, there has been little  
12 progress. In this debate it is usually forgotten that cannabis was a licensed medicine in the UK  
13 before 1971. So why does the government not just re-issue the license that applied then? Phenergan  
14 and chloral hydrate have continued to be available in the UK since that time despite no double-blind  
15 clinical trial data and chloral is sometimes used as an anti-epilepsy treatment in the children with  
16 epilepsy who are denied CBMPs!  
17

18  
19 Another factor is the “not invented here” syndrome. UK prescribers often say they only trust data  
20 collected here; an attitude justified by our high-quality health technology assessment processes  
21 especially NICE. However, to ignore data from other countries in a field as complicated as medical  
22 cannabis likely distorts the truth. Medical cannabis has been available for over a decade in many  
23 states in the USA and there are nearly 20,000 patients on the Minnesota database, providing  
24 detailed data on various conditions and PROs since 2015. These data should be interrogated and  
25 formally published as a way to accelerate clinically-relevant information to potential prescribers as  
26 the Health Secretary Matt Hancock stated in July 2019 [18].  
27  
28

29 This statement calls into question the current DHSC rule that medical cannabis must be considered a  
30 “Special”. The challenges of Specials to prescribers are not trivial and include:

- 31 1. Organisational bureaucracy and the subsequent delay of prescribing, approval and supply
- 32 2. Transferring a patient between one sector and another, especially where e.g. primary care will  
33 not continue prescribing of a superficially expensive special or unlicensed product
- 34 3. Local secondary and primary care services having different rules and guidance, particularly about  
35 prescribing unlicensed medicines
- 36 4. Responsibility for prescribing - a licensed product’s manufacturer is accountable for any untold  
37 harm if the product is used within the license, but with an unlicensed product or Special the  
38 **prescriber** assumes responsibility for any harm that occurs, unless it can be directly attributed to  
39 a defect in the actual product.  
40  
41  
42  
43

44 These complexities do give some support to doctors’ perception of prescribing as too difficult.  
45 Moreover, the DHSC has made cannabis a special “special” as prescribing requires a special pink pad  
46 that has to be ordered. Why such constraints are required is unclear given the established safety of  
47 cannabis medicines, but they are problematic for the prescriber and likely deter use.  
48 Most UK doctors have no experience of medical cannabis and comments like “I don’t know what to  
49 prescribe” are often heard. Though understandable they reflect poorly on a profession which  
50 generally welcomes engaging with new therapeutics; until medical cannabis came along prescribers  
51 were rarely fearful of new therapeutics. Moreover, new is not really a credible term given the  
52 decade of CBMPs use in USA, Canada and The Netherlands, and its subsequent publications on the  
53 practical considerations in medical cannabis administration and dosing [19]. The 1998 House of  
54 Lords report on medical cannabis provided clear evidence on efficacy and value of medical cannabis  
55 [20]. Both delta-9-THC [e.g. as nabilone] and a mixture of delta-9-THC and cannabidiol [as Sativex,  
56 made from whole plant extracts] have been licensed medicines in the UK for over a decade. The  
57 decision to move cannabis to Schedule 2 was made on the basis that there was adequate data that it  
58 was a medicine [21]. Whilst there is little in the way of teaching on medical cannabis in the  
59  
60

1  
2  
3 undergrad or postgrad medical curricula, the past couple of years have seen an increasing amount of  
4 medical cannabis educational programmes of varying standards. Especially for clinicians it is  
5 essential to be able to find non-biased educational programmes, highlighting the need for accredited  
6 training to be made available. Drug Science is currently offering free on-line teaching courses on  
7 medical cannabis and is also working on the development of accredited courses together with the  
8 Society for the Study of Addiction.  
9

10  
11 Perhaps one reason for resistance to CBPMs is that for nearly 50 years the medical profession  
12 focused of the risks of cannabis with extreme claims of harms, including male sterility, lung cancer  
13 and schizophrenia. Though these have now been largely debunked and were generally the result of  
14 recreational rather than prescribed medical use, many practitioners may not know this. Even if they  
15 do, there can be significant concern in prescribing a drug that has been vilified for decades as toxic.  
16 Here education is the solution.  
17

18  
19 Furthermore, patients self-medicating are often using the same illicitly sourced products as  
20 recreational users, making differentiation between uses challenging for clinicians. For both patient  
21 and doctor, access to fully regulated products could ensure a known dose and a quality and content  
22 that can actually be monitored.  
23

### 24 **The pharmacy perspective**

25 Pharmacists (especially at Clinical Commissioning Group level) and medical prescribing advisors also  
26 play a significant role, often through Area Prescribing Committees (APCs). Pharmacy advisors tend  
27 to think of themselves as guardians of the public purse in relation to medicines prescribing. Their  
28 default position is usually to resist the cost implications of new medicines by blocking approval to  
29 local prescribing lists. Here the resistance is often derived from a misplaced focus of prescription  
30 costs with the cost benefits of saving in other medicines and interventions being ignored; e.g.  
31 medical cannabis can reduce the use of strong opioids [22, 23], and lower prescription costs [24].  
32  
33

34 We suggest that APCs should give CBPMs a fair chance by:

- 35 • Ensure better training locally
- 36 • Agreeing with the relevant consultants e.g. pain or neurology clinics, a specified number of  
37 patients each year
- 38 • Factor in the costs of the alternatives e.g. opioid overuse (due to lack of efficacy for many pains),  
39 benzodiazepines and pregabalin/gabapentin over- or self-medication
- 40 • Take genuine notice of testimonies from patients, who will not be diverting CBPMs because they  
41 need it
- 42 • Remember that generic substitution of CBPMs is challenging as all products have different ratios  
43 of THC and CBD and may give different actions
- 44 • Remember that there are many CBMPs with low THC or absent of THC. Also, the common routes  
45 of ingestion (i.e. oral oil/capsule) make it unlikely for patients to have immediate intoxication  
46 effects.
- 47 • In order to clarify cost implications of prescribing CBMPs, it is essential to conduct a full health  
48 economic analysis. Quality cost savings analyses are lacking at present and will be important for  
49 governments to enable active changes.  
50  
51  
52  
53  
54

### 55 **Conclusions**

56 The many thousands of UK patients self-medicating with non-regulated CBPMs and the international  
57 data base evidence suggest these new medical products offer a significant advance in treatment for  
58 many in whom current medicines are either ineffective or poorly tolerated. They also offer the  
59 potential of significant cost savings to the NHS in terms of reduced hospital stays and less prescribing  
60

1  
2  
3 of other medicines particularly opioids for chronic pain. The failure of the medical and pharmacy  
4 professions to embrace CBPMs despite their being made “legal” over 18 months ago is a great worry  
5 to patients and will already likely have led to preventable deaths from conditions such as epilepsy.  
6 We hope that this paper will help policy makers and prescribers understand the challenges to  
7 prescribing and so help them develop approaches to overcome the current highly unsatisfactory  
8 situation.  
9  
10  
11  
12

### 13 **Contributorship statement**

14 Prof David Nutt is guarantor and developed the initial manuscript. Prof Lawrence D Phillips and Dr  
15 Anne K Schlag developed the section on concerns about perceived lack of evidence, and the  
16 importance of n=1 trials. Dr Steve Bazire wrote the pharmacy perspective, and the suggested  
17 guidance for Area Prescribing Committees. All authors reviewed the manuscript and agreed on the  
18 final submission.  
19  
20

21 *The Corresponding Author has the right to grant on behalf of all authors and does grant on behalf of*  
22 *all authors, an exclusive licence (or non exclusive for government employees) on a worldwide basis to*  
23 *the BMJ Publishing Group Ltd to permit this article (if accepted) to be published in BMJ editions and*  
24 *any other BMJ PGL products and sublicences such use and exploit all subsidiary rights, as set out in*  
25 *our licence.*  
26  
27

### 28 **Ethical approval**

29 Ethical approval was not required.  
30

### 31 **Patient and public involvement**

32 Patients and/or members of the public were not involved in the creation of their article.  
33  
34

### 35 **Dissemination declaration**

36 Dissemination to these groups is not applicable.  
37

### 38 **Data sharing statement**

39 No additional data available.  
40

### 41 **Funding**

42 No funding was received for the writing of this paper.  
43  
44

### 45 **Declarations of Interest**

46 Dr Schlag is a paid researcher for Drug Science a charity that receives unrestricted educational  
47 donations from several sources including some companies that manufacture or distribute medical  
48 cannabis products. The others declare no conflicts.  
49  
50

### 51 **References**

- 52  
53 1 Sumnall H. Medicinal cannabis: legalised yet impossible to access. The Independent 13 May 2019.  
54 [https://www.independent.co.uk/life-style/health-and-families/health-news/medicinal-cannabis-](https://www.independent.co.uk/life-style/health-and-families/health-news/medicinal-cannabis-legalised-access-marijuana-nhs-a8903051.html)  
55 [legalised-access-marijuana-nhs-a8903051.html](https://www.independent.co.uk/life-style/health-and-families/health-news/medicinal-cannabis-legalised-access-marijuana-nhs-a8903051.html)  
56  
57  
58 2 Wickware C. NHS England cannabis access review to speak with families paying £40k for private  
59 prescriptions. The Pharmaceutical Journal 13 May 2019. <https://www.pharmaceutical->  
60

1  
2  
3 [journal.com/news-and-analysis/news/nhs-england-cannabis-access-review-to-speak-with-families-](https://www.bmj.com/news-and-analysis/news/nhs-england-cannabis-access-review-to-speak-with-families-paying-40k-for-private-prescriptions/20206525.article)  
4 [paying-40k-for-private-prescriptions/20206525.article](https://www.bmj.com/news-and-analysis/news/nhs-england-cannabis-access-review-to-speak-with-families-paying-40k-for-private-prescriptions/20206525.article)  
5

6 3 Couch D (2020) Left behind: The scale of illegal cannabis use for medicinal intent in the UK.  
7 Available at: [https://www.thecmcuk.org/left-behind-the-scale-of-illegal-cannabis-use-for-medicinal-](https://www.thecmcuk.org/left-behind-the-scale-of-illegal-cannabis-use-for-medicinal-intent-inthe-uk)  
8 [intent-inthe-uk](https://www.thecmcuk.org/left-behind-the-scale-of-illegal-cannabis-use-for-medicinal-intent-inthe-uk) (accessed 11 June 2020).  
9

10 4 National Academies of Sciences, Engineering, and Medicine (NASEM). The health effects of  
11 cannabis and cannabinoids: The current state of evidence and recommendations for research.  
12 Washington, DC: The National Academies Press, 2017.  
13  
14

15 5 Health Canada. Canada Vigilance Adverse Reaction Online Database.  
16 [https://www.canada.ca/en/health-canada/services/drugs-health-products/medeffect-](https://www.canada.ca/en/health-canada/services/drugs-health-products/medeffect-canada/adverse-reaction-database.html)  
17 [canada/adverse-reaction-database.html](https://www.canada.ca/en/health-canada/services/drugs-health-products/medeffect-canada/adverse-reaction-database.html) (accessed 11 June 2020)  
18

19 6 Minnesota Department of Health : Medical Cannabis Programme Data.  
20 <https://www.health.state.mn.us/people/cannabis/data/index.html> (accessed 11 June 2020)  
21  
22

23 7 Hatswell A, Baio G, Berlin J, Irs, A, Freemantle N. Regulatory approval of pharmaceuticals without a  
24 randomised controlled study: analysis of EMA and FDA approvals 1999–2014. *BMJ Open* 2016; 6(6):  
25 e011666.  
26  
27

28 8 The Royal College of Physicians: Sir Michael Rawlins attacks traditional ways of assessing evidence,  
29 Opinion Former Article 16 October 2008. [https://www.politics.co.uk/opinion-formers/royal-college-](https://www.politics.co.uk/opinion-formers/royal-college-of-physicians/article/royal-college-of-physicians-sir-michael-rawlins-attacks-trad)  
30 [of-physicians/article/royal-college-of-physicians-sir-michael-rawlins-attacks-trad](https://www.politics.co.uk/opinion-formers/royal-college-of-physicians/article/royal-college-of-physicians-sir-michael-rawlins-attacks-trad)  
31  
32

33 9 Ueberall M, Essner U, Mueller-Schwefe G. Effectiveness and tolerability of THC: CBD oromucosal  
34 spray as add-on measure in patients with severe chronic pain: Analysis of 12-week open-label real-  
35 world data provided by the German pain e-registry. *J Pain Res.* 2019; 12: 1577-1604.  
36

37 10 Balash Y, Bar-Lev Schleider L, Korczyn A et al. Medical Cannabis in Parkinson Disease: Real-Life  
38 Patients' Experience. *Clin. Neuropharmacol.* 2017; 40(6):268-272. doi:  
39 10.1097/WNF.0000000000000246.  
40

41 11 Bar-Lev Schleider L, Mechoulam R, Saban N, Meiri G, Novack V. Real life Experience of  
42 Medical Cannabis Treatment in Autism: Analysis of Safety and Efficacy. *Sci Rep.* 2019; 9(1):200. doi:  
43 10.1038/s41598-018  
44  
45

46 12 Steinhubl S, Wolff-Hughes D, Nilsen W, Iturriaga N, Califf R. Digital clinical trials: creating a vision  
47 of the future. *NPJ Digit Med.* 2019; 2:126. doi.org/10.1038/s41746-019-0203-0  
48

49 13 Davis K, Farooq S, Hives K et al. Pharmacoepidemiology research: delivering evidence about drug  
50 safety and effectiveness in mental health. *Lancet Psy* 2019; Nov 25.  
51 DOI:[https://doi.org/10.1016/S2215-0366\(19\)30298-6](https://doi.org/10.1016/S2215-0366(19)30298-6)  
52  
53

54 14 Lillie E, Patay B, Diamant J, Issell B, Topol E, Schork N. The n-of-1 clinical trial: the ultimate  
55 strategy for individualizing medicine? *Future Medicine.* 2011; 8(2).  
56 doi:<https://doi.org/10.2217/pme.11.7>  
57  
58

59 15 Porcino A, Shamseer L, Chan A, et al on behalf of the SPENT group. SPIRIT extension and  
60 elaboration for n-of-1 trials: SPENT 2019 checklist. *BMJ* 2020; 368: m122.

1  
2  
3  
4 16 Zucker D, Ruthazer R, Schmid C. Individual (N-of-1) trials can be combined to give population  
5 comparative treatment effect estimates: ethodologic considerations. J Clin Epidemiol. 2010; 63(12):  
6 1312-1323. doi:10.1016/j.jclinepi.2010.04.020  
7

8  
9 17 Spiegelhalter D. The Art of Statistics: Leaning from Data. United Kingdom: Penguin Random  
10 House, 2019.  
11

12 18 UK trials not needed for medical cannabis licensing process, says Hancock. The Pharmaceutical  
13 Journal. 15 July 2019. [https://www.pharmaceutical-journal.com/news-and-analysis/news-in-](https://www.pharmaceutical-journal.com/news-and-analysis/news-in-brief/uk-trials-not-needed-for-medical-cannabis-licensing-process-says-hancock/20206808.fullarticle?firstPass=false)  
14 [brief/uk-trials-not-needed-for-medical-cannabis-licensing-process-says-](https://www.pharmaceutical-journal.com/news-and-analysis/news-in-brief/uk-trials-not-needed-for-medical-cannabis-licensing-process-says-hancock/20206808.fullarticle?firstPass=false)  
15 [hancock/20206808.fullarticle?firstPass=false](https://www.pharmaceutical-journal.com/news-and-analysis/news-in-brief/uk-trials-not-needed-for-medical-cannabis-licensing-process-says-hancock/20206808.fullarticle?firstPass=false)  
16

17  
18 19 MacCallum C and Rosso E. Practical consideration in medical cannabis administration and dosing.  
19 Eur Journ Intern Med. 2018 ; 49 : 12-19.  
20

21 20 House of Lords Report. Cannabis: The scientific and medical evidence. 1998.  
22 <https://publications.parliament.uk/pa/ld199798/ldselect/ldsctech/151/15102.htm> (accessed 11  
23 June 2020)  
24

25  
26 21 Dame Sally Davis. Cannabis Scheduling Review Part 1- The therapeutic and medicinal benefits of  
27 Cannabis based products – a review of recent evidence. 2018.  
28 [https://assets.publishing.service.gov.uk/government/uploads/system/uploads/attachment\\_data/file](https://assets.publishing.service.gov.uk/government/uploads/system/uploads/attachment_data/file/722010/CMO_Report_Cannabis_Products_Web_Accessible.pdf)  
29 [/722010/CMO\\_Report\\_Cannabis\\_Products\\_Web\\_Accessible.pdf](https://assets.publishing.service.gov.uk/government/uploads/system/uploads/attachment_data/file/722010/CMO_Report_Cannabis_Products_Web_Accessible.pdf) (accessed 11 June 2020)  
30

31  
32 22 McMichael B, Van Horn R, Viscusi, W. The impact of cannabis access laws on opioid prescribing. J  
33 Health Econ. Jan 2020; 69. <https://doi.org/10.1016/j.jhealeco.2019.102273>  
34

35 23 Boehnke K, Litinas E, Clauw, D. Medical cannabis use Is associated with decreased opiate  
36 medication use in a retrospective cross-sectional survey of patients with chronic pain. Journal of  
37 Pain. 2016; 17(6): 739–744. <https://doi.org/10.1016/j.jpain.2016.03.002>  
38

39  
40 24 Bellnier T, Brown G, Ortega T. Preliminary evaluation of the efficacy, safety, and costs associated  
41 with the treatment of chronic pain with medical cannabis. Ment Health Clin. 2018; 8(3): 110-115.  
42  
43  
44  
45  
46  
47  
48  
49  
50  
51  
52  
53  
54  
55  
56  
57  
58  
59  
60
